# Supplementary material for: SHIELD: An AI Framework for Skeletal Health Intelligence and Early Lesion Detection to Improve Orthopedic Referrals
Source: Research Square preprint supplement (doi:10.21203/rs.3.rs-7926103/v1), 2025-11-11
Supplement: Supplementary file 1 [file 6faf81af89df71f215b0680c.docx]

**Supplementary Materials**

**Table S1.** Comprehensive list of unique medical terms provided by an expert orthopedist, which two medical students used to sort radiology reports into three classes and label them.

| **Category** | **Subcategory** | **Terms/Descriptors** |
| --- | --- | --- |
| Anatomic | General Bone | Bony, Bone, Osseous |
|  | Upper Extremity | Humerus/ Humeral, Radius, Ulna |
|  | Lower Extremity | Femur/ Femoral, Tibia/ Tibial, Fibula |
| Disease | Metastatic | Metastatic/ metastases, Malignancy/ malignant, Neoplastic |
|  | Pattern | Lytic (hypodense, lucent), Sclerotic (blastic, hyperdense, radiopaque), Mixed (lytic/sclerotic) |
|  | Margins | Well-defined, Ill-defined |
|  | Lesion | PSMA avid osseous lesion, Aggressive appearing, Infiltrative lesion, enhancing lesion FDG avidity/ uptake in (bone), (Increased) SUV max, T1 hypointense T2 hyperintense, Increased uptake in (bone), Hypermetabolic lesion, Hypermetabolic osseous disease, Focus of mineralization, Suspicious bony lesion, Lucency, Expansile, Hyper-enhancing, Hypointense, Destructive |
| Clinical | Bony Concerns | Loss of cortical integrity, Endosteal scalloping, Periosteal reaction, Cortical thinning, Cortical erosion, Cortical destruction, Cortical breakthrough, (Trans)cortical permeation, Osseous destruction, Osteonecrosis, Signal change (marrow), Marrow replacing, Cortical thickening, Marrow infiltration, Cortical narrowing, Endosteal erosion, Cortical discontinuity, Transcortical soft tissue extension, Suspicious for progression of osseous disease |
|  | High Risk | Lesion/ patient is at (high) risk of pathologic fracture, Increased risk of pathologic fracture, impending pathologic fracture, predisposed to pathologic fracture, Loss of cortical integrity, Lytic changes, Lytic lesion, Destructive lesion, Moth-eaten appearance, Mottled, Concerning for instability, Cortical thinning, Cortical erosion, Cortical destruction, Cortical breakthrough, Cortical transgression. Cortical dehiscence, Osseous destruction, Osteolysis, Periosteal edema/ reaction, Periostitis, Endosteal scalloping, Aggressive/ aggressive appearing, Permeative, Possible pathologic fracture, Cortical permeation, Cortical disruption, Cortical loss, Osteonecrosis, Marrow edema/signal, Cortical discontinuity |
|  |  |

**Table S2.** We utilizedBioBERT (dmis-lab/biobert-v1.1) model to generate vector embeddings of clinician-only and LLM-only terms. Cosine similarity was computed between all term pairs, producing a similarity matrix. This enabled identification of LLM terms that were semantically aligned with clinician terms despite lexical differences. Similarity categories were defined as High (likely synonyms, score > 0.9), Moderate (related concepts, score 0.75–0.9), or Low (likely unrelated, score < 0.75).

| **LLM-Only Term** | **Closest Clinician Term** | **Similarity Score** | **Analysis** |
| --- | --- | --- | --- |
| additional smaller lytic lesion | destructive lesion | 0.9 | High (Likely Synonym) |
| mildly displaced subacute fracture of the left femur | patient is at high risk of pathologic fracture | 0.85 | Moderate (Related Concept) |
| widespread osseous metastatic disease | suspicious for progression of osseous disease | 0.92 | High (Likely Synonym) |
| intertrochanteric region of the right femur | patient is at high risk of pathologic fracture | 0.84 | Moderate (Related Concept) |
| small focus of lytic lesion at the proximal right femur | psma avid osseous lesion | 0.88 | Moderate (Related Concept) |
| consider mri | ulna | 0.86 | Moderate (Related Concept) |
| pathologic fracture | possible pathologic fracture | 0.96 | High (Likely Synonym) |
| heterogeneously t2 hyperintense t1 hypointense | hypermetabolic lesion in bone | 0.88 | Moderate (Related Concept) |
| proximal left femur | femur | 0.91 | High (Likely Synonym) |
| femoral head | femur | 0.94 | High (Likely Synonym) |
| malignant marrow signal involving the proximal right femur | psma avid osseous lesion | 0.87 | Moderate (Related Concept) |
| finding are highly concerning for primary or metastatic osseous lesion | suspicious for progression of osseous disease | 0.93 | High (Likely Synonym) |
| permeative lesion in the right proximal humeral shaft | psma avid osseous lesion | 0.88 | Moderate (Related Concept) |
| multiple lytic lesion in the skeleton | psma avid osseous lesion | 0.92 | High (Likely Synonym) |
| involving the axial and appendicular skeleton | suspicious for progression of osseous disease | 0.86 | Moderate (Related Concept) |
| asymmetrical sclerotic density | sclerotic | 0.91 | High (Likely Synonym) |
| illdefined | cortical discontinuity | 0.82 | Moderate (Related Concept) |
| hypermetabolic osseous lesion | hypermetabolic osseous disease | 0.97 | High (Likely Synonym) |
| multifocal metastatic lesion | malignant metastatic | 0.91 | High (Likely Synonym) |
| expansile humeral shaft mass | suspicious for progression of osseous disease | 0.87 | Moderate (Related Concept) |
| humeral neck | humerus | 0.96 | High (Likely Synonym) |
| distal femur | femur | 0.94 | High (Likely Synonym) |
| suspicious | destructive | 0.96 | High (Likely Synonym) |
| lytic lesion involving the femoral head | psma avid osseous lesion | 0.9 | Moderate (Related Concept) |
| presence of multiple osseous sclerotic and lytic lesion | suspicious for progression of osseous disease | 0.91 | High (Likely Synonym) |
| the patient is at significant risk for pathologic fracture given the degree of bony involvement | patient is at high risk of pathologic fracture | 0.95 | High (Likely Synonym) |
| proximal humerus | humerus | 0.92 | High (Likely Synonym) |
| possible metastasis | metastasis | 0.95 | High (Likely Synonym) |
| associated soft tissue mass | suspicious bony lesion | 0.9 | Moderate (Related Concept) |
| skeletal metastasis | metastasis | 0.96 | High (Likely Synonym) |
| aggressive process | lytic change | 0.9 | High (Likely Synonym) |
| bone reaction | osseous destruction | 0.89 | Moderate (Related Concept) |
| osseous lesion | osseous destruction | 0.95 | High (Likely Synonym) |
| permeative bone destruction | permeative | 0.93 | High (Likely Synonym) |
| metastatic breast cancer | metastasis | 0.91 | High (Likely Synonym) |
| permeation through the lateral cortex | cortical permeation | 0.95 | High (Likely Synonym) |
| sarcoma not excluded | neoplastic | 0.89 | Moderate (Related Concept) |
| extraosseous soft tissue | transcortical soft tissue extension | 0.89 | Moderate (Related Concept) |
| increasing inflammatory change | marrow ede masignal | 0.87 | Moderate (Related Concept) |
| intramedullary | transcortical soft tissue extension | 0.87 | Moderate (Related Concept) |
| pathologic fracture of t3 and t4 with vertebral plana of t4 | patient is at high risk of pathologic fracture | 0.89 | Moderate (Related Concept) |
| aggressive lytic metastasis | malignantmetastatic | 0.94 | High (Likely Synonym) |
| lytic lesion within the l2 vertebral body | psma avid osseous lesion | 0.88 | Moderate (Related Concept) |
| hepatic and osseous metastatic lesion | suspicious for progression of osseous disease | 0.92 | High (Likely Synonym) |
| low t1 and high t2weighted signal | marrow edema signal | 0.87 | Moderate (Related Concept) |
| abnormal soft tissue in the intramedullary space | transcortical soft tissue extension | 0.87 | Moderate (Related Concept) |
| localized pathologic fracture | impending pathologic fracture | 0.96 | High (Likely Synonym) |
| illdefined sclerosis | cortical discontinuity | 0.87 | Moderate (Related Concept) |
| axial and proximal appendicular osseous metastasis | suspicious for progression of osseous disease | 0.9 | High (Likely Synonym) |
| necrotic appearing pelvic lymph node | infiltrative lesion | 0.87 | Moderate (Related Concept) |
| associated with history of renal cell cancer | patient is at high risk of pathologic fracture | 0.88 | Moderate (Related Concept) |
| soft tissue mass | transcortical soft tissue extension | 0.89 | Moderate (Related Concept) |
| high risk for pathologic fracture | increased risk of pathologic fracture | 0.98 | High (Likely Synonym) |
| large lesion within the mid to distal humeral shaft | suspicious for progression of osseous disease | 0.86 | Moderate (Related Concept) |
| expansile lytic lesion involving the left anterior 5th rib | psma avid osseous lesion | 0.9 | Moderate (Related Concept) |
| soft tissue component | transcortical soft tissue extension | 0.9 | High (Likely Synonym) |
| femoral diaphysis | tibia | 0.87 | Moderate (Related Concept) |
| hypermetabolic lesion | hypermetabolic lesion in bone | 0.96 | High (Likely Synonym) |
| satellite lesion in the distal femur and proximal tibia | hypermetabolic lesion in bone | 0.87 | Moderate (Related Concept) |
| marrow replacing lesion | marrow infiltration | 0.93 | High (Likely Synonym) |
| bone scan | signal change marrow | 0.85 | Moderate (Related Concept) |
| callus formation | focus of mineralization | 0.86 | Moderate (Related Concept) |
| hypermetabolic lesion in the l5 vertebral body | hypermetabolic lesion in bone | 0.93 | High (Likely Synonym) |
| early lesion within the proximal humeral metaphysis | suspicious for progression of osseous disease | 0.85 | Moderate (Related Concept) |
| multiple lytic lesion | destructive lesion | 0.93 | High (Likely Synonym) |
| metastatic | metastasis | 0.94 | High (Likely Synonym) |
| mildly displaced pathologic fracture | impending pathologic fracture | 0.96 | High (Likely Synonym) |
| multifocal | lytic change | 0.89 | Moderate (Related Concept) |
| osteopenia | osteonecrosis | 0.9 | High (Likely Synonym) |
| greater trochanteric | patient is at high risk of pathologic fracture | 0.82 | Moderate (Related Concept) |
| multiple metastatic lesion in the femur and pelvis | psma avid osseous lesion | 0.89 | Moderate (Related Concept) |
| active metastatic disease is not excluded | suspicious for progression of osseous disease | 0.91 | High (Likely Synonym) |
| permeation of the remainder of the cortex | cortical permeation | 0.91 | High (Likely Synonym) |
| lytic lesion of the lesser trochanter of the right proximal femur | hypermetabolic lesion in bone | 0.84 | Moderate (Related Concept) |
| similar appearance of mixed sclerotic and lytic lesion within the t8 vertebral body | psma avid osseous lesion | 0.88 | Moderate (Related Concept) |
| risk of pathologic fracture | increased risk of pathologic fracture | 0.99 | High (Likely Synonym) |
| infiltrative and destructive lesion of the proximal right femur | infiltrative lesion | 0.89 | Moderate (Related Concept) |
| incompletely imaged metastatic lesion within the c6 vertebral body | psma avid osseous lesion | 0.88 | Moderate (Related Concept) |
| masslike lesion | suspicious bony lesion | 0.92 | High (Likely Synonym) |
| metastatic disease | metastasis | 0.96 | High (Likely Synonym) |
| suspicion of some possible subtle crack within the cortical region | cortical discontinuity | 0.91 | High (Likely Synonym) |
| intercondylar notch | osseous destruction | 0.84 | Moderate (Related Concept) |
| surrounding callus | focus of mineralization | 0.9 | High (Likely Synonym) |
| compression fracture of t8 and t12 with similar degree of height loss and bony retropulsion | patient is at high risk of pathologic fracture | 0.89 | Moderate (Related Concept) |
| concerning for a bone tumor | concerning for instability | 0.89 | Moderate (Related Concept) |
| intertrochanteric region | endosteal erosion | 0.84 | Moderate (Related Concept) |
| pathologic fracture of the right femoral neck | patient is at high risk of pathologic fracture | 0.89 | Moderate (Related Concept) |
| metastatic anorectal squamous cell cancer | suspicious for progression of osseous disease | 0.85 | Moderate (Related Concept) |
| edema | hyper enhancing | 0.87 | Moderate (Related Concept) |
| sclerotic lesion in multiple midthoracic vertebral body | hypermetabolic lesion in bone | 0.87 | Moderate (Related Concept) |
| lytic lesion eroding the body of t3 on the right side with extension into the spinal canal | psma avid osseous lesion | 0.85 | Moderate (Related Concept) |
| lytic bone lesion in the left femur | psma avid osseous lesion | 0.9 | Moderate (Related Concept) |
| recommend urgent orthopedic oncologic consultation to assess for need for prophylactic fixation | patient is at high risk of pathologic fracture | 0.87 | Moderate (Related Concept) |
| surrounding periosteal reaction | Osteolysis periosteal edema | 0.92 | High (Likely Synonym) |
| recommendation for percutaneous biopsy | suspicious for progression of osseous disease | 0.84 | Moderate (Related Concept) |
| osseous metastatic lesion | suspicious for progression of osseous disease | 0.92 | High (Likely Synonym) |
| innumerable osseous metastatic lesion | suspicious for progression of osseous disease | 0.92 | High (Likely Synonym) |
| proximal right humerus | humerus | 0.9 | Moderate (Related Concept) |
| sclerotic margin | sclerotic | 0.97 | High (Likely Synonym) |
| history of intramedullary rod and screw stabilization | patient is at high risk of pathologic fracture | 0.85 | Moderate (Related Concept) |
| presence of lytic lesion and sclerotic lesion indicating bone metastasis | psma avid osseous lesion | 0.91 | High (Likely Synonym) |
| clinical history of bone mets and right femur pain | psma avid osseous lesion | 0.87 | Moderate (Related Concept) |
| proximal right femur | femur | 0.91 | High (Likely Synonym) |
| l2 compression deformity with interval increase in height loss | patient is at high risk of pathologic fracture | 0.88 | Moderate (Related Concept) |
| sclerotic change | sclerotic | 0.98 | High (Likely Synonym) |
| mid humeral diaphysis | tibia | 0.83 | Moderate (Related Concept) |
| fracture | radius | 0.91 | High (Likely Synonym) |
| additional focus of sclerosis with some intermixed lucency | psma avid osseous lesion | 0.89 | Moderate (Related Concept) |
| sclerotic lesion | sclerotic | 0.96 | High (Likely Synonym) |
| sclerosis of the right aspect of the t10 vertebral body extending to the lamina pedicle and transverse process which wa previously lytic | suspicious for progression of osseous disease | 0.86 | Moderate (Related Concept) |
| similar mixed lytic and sclerotic lesion of the posterior right second and eighth rib and anterior left sixth rib | psma avid osseous lesion | 0.86 | Moderate (Related Concept) |
| bilateral proximal humerus involvement | humerus | 0.87 | Moderate (Related Concept) |
| possibility of a primary osseous neoplasm or lymphoma can not be excluded | suspicious for progression of osseous disease | 0.89 | Moderate (Related Concept) |
| redemonstrated left second rib lesion | psma avid osseous lesion | 0.86 | Moderate (Related Concept) |
| increase in size of the left supraclavicular lymph node | suspicious for progression of osseous disease | 0.86 | Moderate (Related Concept) |
| Aggressive appearing lytic lesion | psma avid osseous lesion | 0.88 | Moderate (Related Concept) |
| multiple lytic lesion in the bone | psma avid osseous lesion | 0.93 | High (Likely Synonym) |
| mixed sclerotic and lytic appearance of the lesion | infiltrative lesion | 0.89 | Moderate (Related Concept) |
| enlarging lytic lesion of the right femoral head | psma avid osseous lesion | 0.88 | Moderate (Related Concept) |
| nodule in the lung | infiltrative lesion | 0.87 | Moderate (Related Concept) |
| medial tibial metaphysis | tibia | 0.89 | Moderate (Related Concept) |
| metastatic lesion involving the proximal right femur | hypermetabolic lesion in bone | 0.86 | Moderate (Related Concept) |
| expansile destructive right proximal humerus mass | suspicious for progression of osseous disease | 0.87 | Moderate (Related Concept) |
| differential diagnosis includes primary tumor sarcoma possible metastatic deposit or plasmacytoma | psma avid osseous lesion | 0.89 | Moderate (Related Concept) |
| progression of metastatic disease | metastasis | 0.92 | High (Likely Synonym) |
| redemonstrated diffuse lytic and sclerotic lesion in the spine sternum and rib | psma avid osseous lesion | 0.9 | High (Likely Synonym) |
| additional metastatic lesion involving the upper right iliac bone | psma avid osseous lesion | 0.89 | Moderate (Related Concept) |
| indeterminate lucent lesion | infiltrative lesion | 0.88 | Moderate (Related Concept) |
| pathologic fracture without significant displacement | impending pathologic fracture | 0.96 | High (Likely Synonym) |
| pelvic pain | suspicious for progression of osseous disease | 0.81 | Moderate (Related Concept) |
| decreased t1 and increased t2 signal intensity | increased uptake in bone | 0.89 | Moderate (Related Concept) |
| lytic lesion within the posterior element of l1 with encroachment into the spinal canal | suspicious for progression of osseous disease | 0.85 | Moderate (Related Concept) |
| osteolytic lesion | Osteolysis periosteal edema | 0.94 | High (Likely Synonym) |
| femoral metaphysis | femur | 0.91 | High (Likely Synonym) |
| index lesion in the right femoral neck with suv max 82 | psma avid osseous lesion | 0.87 | Moderate (Related Concept) |
| metastatic lytic lesion | psma avid osseous lesion | 0.92 | High (Likely Synonym) |
| infiltrative aggressive process | infiltrative lesion | 0.96 | High (Likely Synonym) |
| pathological fracture | possible pathologic fracture | 0.93 | High (Likely Synonym) |
| history of breast cancer | suspicious for progression of osseous disease | 0.84 | Moderate (Related Concept) |
| compatible with neoplasm | malignancy | 0.92 | High (Likely Synonym) |
| metastatic cancer | metastasis | 0.96 | High (Likely Synonym) |
| lytic lesion within the left anterior acetabulum | psma avid osseous lesion | 0.88 | Moderate (Related Concept) |
| proximal humerus diaphysis | tibia | 0.83 | Moderate (Related Concept) |
| lucent lesion in the femur | hypermetabolic lesion in bone | 0.91 | High (Likely Synonym) |
| extensive enhancement of the lesion | suspicious bony lesion | 0.88 | Moderate (Related Concept) |
| tarlov cyst | periostitis | 0.85 | Moderate (Related Concept) |
| concern for soft tissue neoplasm | suspicious for progression of osseous disease | 0.89 | Moderate (Related Concept) |
| suspicious lesion | suspicious bony lesion | 0.95 | High (Likely Synonym) |
| femoral neck | femur | 0.94 | High (Likely Synonym) |
| permeative lesion | permeative | 0.93 | High (Likely Synonym) |
| further evaluation with mri with and without contrast recommended | suspicious for progression of osseous disease | 0.87 | Moderate (Related Concept) |
| marked destruction of both the greater and lesser trochanter | suspicious for progression of osseous disease | 0.83 | Moderate (Related Concept) |
| small area of cortical discontinuity | cortical discontinuity | 0.96 | High (Likely Synonym) |
| lesion within the left femoral neck | hypermetabolic lesion in bone | 0.86 | Moderate (Related Concept) |
| diffuse osseous metastatic disease | suspicious for progression of osseous disease | 0.93 | High (Likely Synonym) |
| metastatic prostate carcinoma given history | suspicious for progression of osseous disease | 0.89 | Moderate (Related Concept) |
| lesion of the left proximal humerus | suspicious bony lesion | 0.85 | Moderate (Related Concept) |
| surrounding marrow edema | marrow edema signal | 0.94 | High (Likely Synonym) |
| bone metastasis | metastasis | 0.96 | High (Likely Synonym) |
| uptake within the posterior right elbow | psma avid osseous lesion | 0.88 | Moderate (Related Concept) |
| moderate osteoarthritis extensive lytic osseous metastatic disease | suspicious for progression of osseous disease | 0.92 | High (Likely Synonym) |
| mixed lytic sclerotic lesion | infiltrative lesion | 0.91 | High (Likely Synonym) |
| involves the entire humeral head and into the metaphyseal region | suspicious for progression of osseous disease | 0.85 | Moderate (Related Concept) |
| Well defined cystic focus | psma avid osseous lesion | 0.89 | Moderate (Related Concept) |
| proximal femur | femur | 0.94 | High (Likely Synonym) |
| risk of further pathological fracture | increased risk of pathologic fracture | 0.95 | High (Likely Synonym) |
| acute nondisplaced pathologic fracture of the medial femoral condyle | patient is at high risk of pathologic fracture | 0.86 | Moderate (Related Concept) |
| soft tissue swelling | transcortical soft tissue extension | 0.89 | Moderate (Related Concept) |
| history of neoplasm | malignancy | 0.89 | Moderate (Related Concept) |
| patient at high risk for impending pathologic fracture | patient is at high risk of pathologic fracture | 0.98 | High (Likely Synonym) |
| degenerative finding | sclerotic | 0.89 | Moderate (Related Concept) |
| large soft tissue mass | suspicious bony lesion | 0.89 | Moderate (Related Concept) |
| soft tissue component extends significantly beyond the cortex | transcortical soft tissue extension | 0.9 | High (Likely Synonym) |
| lytic lesion within the right iliac bone and acetabulum | psma avid osseous lesion | 0.89 | Moderate (Related Concept) |
| possible minimal labral calcification | suspicious for progression of osseous disease | 0.87 | Moderate (Related Concept) |
| lytic lesion within the right sacrum the left posterior iliac bone s1 | psma avid osseous lesion | 0.89 | Moderate (Related Concept) |
| unchanged sclerotic lesion of l1 and the left ilium | psma avid osseous lesion | 0.87 | Moderate (Related Concept) |
| enhancing extrasseous soft tissue component | transcortical soft tissue extension | 0.92 | High (Likely Synonym) |
| possibility of metastatic disease to the left humeral head | suspicious for progression of osseous disease | 0.89 | Moderate (Related Concept) |
| concerning for metastatic disease | Malignant metastatic | 0.91 | High (Likely Synonym) |
| prior malignancy | malignancy | 0.91 | High (Likely Synonym) |
| possibility of a renal cell metastatic lesion within the left humeral head | psma avid osseous lesion | 0.88 | Moderate (Related Concept) |
| lytic metastatic bone lesion | psma avid osseous lesion | 0.93 | High (Likely Synonym) |
| parosteal in location | cortical transgression | 0.88 | Moderate (Related Concept) |
| degenerative change within the spine | suspicious for progression of osseous disease | 0.91 | High (Likely Synonym) |
| pathologic fracture risk | impending pathologic fracture | 0.96 | High (Likely Synonym) |
